# Supplementary material for: Global Avian Flu Risk: Waterbird Entropy for Targeted Surveillance
Source: Research Square preprint supplement (doi:10.21203/rs.3.rs-6120298/v1), 2025-03-17
Supplement: Supplementary file 1 [file a891b178ef6ea8fe4b7fa8fd.xlsx]

## Sheet: Sheet1
Order	Family	Genus	Latin Name	Functional Group	Host Type
Charadriiformes	Scolopacidae	Actitis	Actitis hypoleucos	shorebirds	Suspected Host
Charadriiformes	Scolopacidae	Actitis	Actitis macularius	shorebirds	Suspected Host
Charadriiformes	Jacanidae	Actophilornis	Actophilornis africanus	shorebirds	Suspected Host
Podicipediformes	Podicipedidae	Aechmophorus	Aechmophorus clarkii	others	Suspected Host
Podicipediformes	Podicipedidae	Aechmophorus	Aechmophorus occidentalis	others	Confirmed Host
Pelecaniformes	Ardeidae	Agamia	Agamia agami	Large wading birds	Suspected Host
Anseriformes	Anatidae	Aix	Aix galericulata	waterfowl	Confirmed Host
Anseriformes	Anatidae	Aix	Aix sponsa	waterfowl	Confirmed Host
Charadriiformes	Alcidae	Alca	Alca torda	seabirds	Suspected Host
Charadriiformes	Alcidae	Alle	Alle alle	seabirds	Suspected Host
Anseriformes	Anatidae	Alopochen	Alopochen aegyptiaca	waterfowl	Confirmed Host
Gruiformes	Rallidae	Amaurornis	Amaurornis flavirostra	shorebirds	Suspected Host
Gruiformes	Rallidae	Amaurornis	Amaurornis phoenicurus	others	Suspected Host
Anseriformes	Anatidae	Amazonetta	Amazonetta brasiliensis	waterfowl	Suspected Host
Charadriiformes	Charadriidae	Anarhynchus	Anarhynchus frontalis	shorebirds	Suspected Host
Anseriformes	Anatidae	Anas	Anas acuta	waterfowl	Confirmed Host
Anseriformes	Anatidae	Anas	Anas andium	waterfowl	Suspected Host
Anseriformes	Anatidae	Anas	Anas bahamensis	waterfowl	Suspected Host
Anseriformes	Anatidae	Anas	Anas bernieri	waterfowl	Suspected Host
Anseriformes	Anatidae	Anas	Anas capensis	waterfowl	Suspected Host
Anseriformes	Anatidae	Anas	Anas carolinensis	waterfowl	Suspected Host
Anseriformes	Anatidae	Anas	Anas castanea	waterfowl	Confirmed Host
Anseriformes	Anatidae	Anas	Anas chlorotis	waterfowl	Suspected Host
Anseriformes	Anatidae	Anas	Anas crecca	waterfowl	Confirmed Host
Anseriformes	Anatidae	Anas	Anas diazi	waterfowl	Suspected Host
Anseriformes	Anatidae	Anas	Anas erythrorhyncha	waterfowl	Confirmed Host
Anseriformes	Anatidae	Anas	Anas flavirostris	waterfowl	Confirmed Host
Anseriformes	Anatidae	Anas	Anas fulvigula	waterfowl	Confirmed Host
Anseriformes	Anatidae	Anas	Anas georgica	waterfowl	Confirmed Host
Anseriformes	Anatidae	Anas	Anas gibberifrons	waterfowl	Suspected Host
Anseriformes	Anatidae	Anas	Anas gracilis	waterfowl	Confirmed Host
Anseriformes	Anatidae	Anas	Anas melleri	waterfowl	Suspected Host
Anseriformes	Anatidae	Anas	Anas platyrhynchos	waterfowl	Confirmed Host
Anseriformes	Anatidae	Anas	Anas poecilorhyncha	waterfowl	Confirmed Host
Anseriformes	Anatidae	Anas	Anas rubripes	waterfowl	Confirmed Host
Anseriformes	Anatidae	Anas	Anas sparsa	waterfowl	Suspected Host
Anseriformes	Anatidae	Anas	Anas superciliosa	waterfowl	Confirmed Host
Anseriformes	Anatidae	Anas	Anas undulata	waterfowl	Confirmed Host
Anseriformes	Anatidae	Anas	Anas zonorhyncha	waterfowl	Confirmed Host
Ciconiiformes	Ciconiidae	Anastomus	Anastomus lamelligerus	others	Suspected Host
Ciconiiformes	Ciconiidae	Anastomus	Anastomus oscitans	others	Suspected Host
Suliformes	Anhingidae	Anhinga	Anhinga anhinga	others	Suspected Host
Suliformes	Anhingidae	Anhinga	Anhinga melanogaster	others	Suspected Host
Suliformes	Anhingidae	Anhinga	Anhinga novaehollandiae	others	Suspected Host
Suliformes	Anhingidae	Anhinga	Anhinga rufa	others	Suspected Host
Charadriiformes	Laridae	Anous	Anous minutus	seabirds	Suspected Host
Charadriiformes	Laridae	Anous	Anous stolidus	seabirds	Suspected Host
Anseriformes	Anatidae	Anser	Anser albifrons	waterfowl	Confirmed Host
Anseriformes	Anatidae	Anser	Anser anser	waterfowl	Confirmed Host
Anseriformes	Anatidae	Anser	Anser brachyrhynchus	waterfowl	Confirmed Host
Anseriformes	Anatidae	Anser	Anser caerulescens	waterfowl	Confirmed Host
Anseriformes	Anatidae	Anser	Anser cygnoides	waterfowl	Confirmed Host
Anseriformes	Anatidae	Anser	Anser erythropus	waterfowl	Confirmed Host
Anseriformes	Anatidae	Anser	Anser fabalis	waterfowl	Confirmed Host
Anseriformes	Anatidae	Anser	Anser indicus	waterfowl	Confirmed Host
Anseriformes	Anatidae	Anser	Anser rossii	waterfowl	Confirmed Host
Anseriformes	Anatidae	Anser	Anser serrirostris	waterfowl	Suspected Host
Anseriformes	Anseranatidae	Anseranas	Anseranas semipalmata	waterfowl	Suspected Host
Gruiformes	Gruidae	Anthropoides	Anthropoides paradiseus	Large wading birds	Suspected Host
Gruiformes	Gruidae	Anthropoides	Anthropoides virgo	Large wading birds	Suspected Host
Procellariiformes	Procellariidae	Aphrodroma	Aphrodroma brevirostris	seabirds	Suspected Host
Sphenisciformes	Spheniscidae	Aptenodytes	Aptenodytes forsteri	seabirds	Suspected Host
Sphenisciformes	Spheniscidae	Aptenodytes	Aptenodytes patagonicus	seabirds	Suspected Host
Gruiformes	Rallidae	Aramides	Aramides albiventris	Large wading birds	Suspected Host
Gruiformes	Rallidae	Aramides	Aramides saracura	Large wading birds	Suspected Host
Gruiformes	Rallidae	Aramides	Aramides ypecaha	Large wading birds	Suspected Host
Gruiformes	Aramidae	Aramus	Aramus guarauna	Large wading birds	Suspected Host
Pelecaniformes	Ardeidae	Ardea	Ardea alba	Large wading birds	Confirmed Host
Pelecaniformes	Ardeidae	Ardea	Ardea cinerea	Large wading birds	Suspected Host
Pelecaniformes	Ardeidae	Ardea	Ardea cocoi	Large wading birds	Suspected Host
Pelecaniformes	Ardeidae	Ardea	Ardea goliath	Large wading birds	Suspected Host
Pelecaniformes	Ardeidae	Ardea	Ardea herodias	Large wading birds	Confirmed Host
Pelecaniformes	Ardeidae	Ardea	Ardea humbloti	Large wading birds	Suspected Host
Pelecaniformes	Ardeidae	Ardea	Ardea melanocephala	Large wading birds	Suspected Host
Pelecaniformes	Ardeidae	Ardea	Ardea pacifica	Large wading birds	Suspected Host
Pelecaniformes	Ardeidae	Ardea	Ardea purpurea	Large wading birds	Suspected Host
Pelecaniformes	Ardeidae	Ardea	Ardea sumatrana	Large wading birds	Suspected Host
Pelecaniformes	Ardeidae	Ardeola	Ardeola bacchus	Large wading birds	Suspected Host
Pelecaniformes	Ardeidae	Ardeola	Ardeola grayii	Large wading birds	Suspected Host
Pelecaniformes	Ardeidae	Ardeola	Ardeola idae	Large wading birds	Suspected Host
Pelecaniformes	Ardeidae	Ardeola	Ardeola ralloides	Large wading birds	Suspected Host
Pelecaniformes	Ardeidae	Ardeola	Ardeola rufiventris	Large wading birds	Suspected Host
Pelecaniformes	Ardeidae	Ardeola	Ardeola speciosa	Large wading birds	Suspected Host
Charadriiformes	Scolopacidae	Arenaria	Arenaria interpres	shorebirds	Confirmed Host
Charadriiformes	Scolopacidae	Arenaria	Arenaria melanocephala	shorebirds	Suspected Host
Charadriiformes	Thinocoridae	Attagis	Attagis gayi	shorebirds	Suspected Host
Anseriformes	Anatidae	Aythya	Aythya affinis	waterfowl	Confirmed Host
Anseriformes	Anatidae	Aythya	Aythya americana	waterfowl	Confirmed Host
Anseriformes	Anatidae	Aythya	Aythya australis	waterfowl	Suspected Host
Anseriformes	Anatidae	Aythya	Aythya baeri	waterfowl	Confirmed Host
Anseriformes	Anatidae	Aythya	Aythya collaris	waterfowl	Confirmed Host
Anseriformes	Anatidae	Aythya	Aythya ferina	waterfowl	Confirmed Host
Anseriformes	Anatidae	Aythya	Aythya fuligula	waterfowl	Confirmed Host
Anseriformes	Anatidae	Aythya	Aythya marila	waterfowl	Confirmed Host
Anseriformes	Anatidae	Aythya	Aythya novaeseelandiae	waterfowl	Suspected Host
Anseriformes	Anatidae	Aythya	Aythya nyroca	waterfowl	Confirmed Host
Anseriformes	Anatidae	Aythya	Aythya valisineria	waterfowl	Confirmed Host
Pelecaniformes	Balaenicipitidae	Balaeniceps	Balaeniceps rex	Large wading birds	Suspected Host
Gruiformes	Gruidae	Balearica	Balearica pavonina	Large wading birds	Suspected Host
Gruiformes	Gruidae	Balearica	Balearica regulorum	Large wading birds	Confirmed Host
Charadriiformes	Scolopacidae	Bartramia	Bartramia longicauda	shorebirds	Suspected Host
Anseriformes	Anatidae	Biziura	Biziura lobata	waterfowl	Suspected Host
Pelecaniformes	Threskiornithidae	Bostrychia	Bostrychia carunculata	Large wading birds	Suspected Host
Pelecaniformes	Threskiornithidae	Bostrychia	Bostrychia hagedash	Large wading birds	Suspected Host
Pelecaniformes	Threskiornithidae	Bostrychia	Bostrychia olivacea	Large wading birds	Suspected Host
Pelecaniformes	Threskiornithidae	Bostrychia	Bostrychia rara	Large wading birds	Suspected Host
Pelecaniformes	Ardeidae	Botaurus	Botaurus lentiginosus	Large wading birds	Suspected Host
Pelecaniformes	Ardeidae	Botaurus	Botaurus pinnatus	Large wading birds	Suspected Host
Pelecaniformes	Ardeidae	Botaurus	Botaurus poiciloptilus	Large wading birds	Suspected Host
Pelecaniformes	Ardeidae	Botaurus	Botaurus stellaris	Large wading birds	Suspected Host
Charadriiformes	Alcidae	Brachyramphus	Brachyramphus marmoratus	seabirds	Suspected Host
Anseriformes	Anatidae	Branta	Branta bernicla	waterfowl	Confirmed Host
Anseriformes	Anatidae	Branta	Branta canadensis	waterfowl	Confirmed Host
Anseriformes	Anatidae	Branta	Branta hutchinsii	waterfowl	Confirmed Host
Anseriformes	Anatidae	Branta	Branta leucopsis	waterfowl	Confirmed Host
Anseriformes	Anatidae	Branta	Branta ruficollis	waterfowl	Confirmed Host
Pelecaniformes	Ardeidae	Bubulcus	Bubulcus coromandus	Large wading birds	Suspected Host
Pelecaniformes	Ardeidae	Bubulcus	Bubulcus ibis	Large wading birds	Suspected Host
Anseriformes	Anatidae	Bucephala	Bucephala albeola	waterfowl	Confirmed Host
Anseriformes	Anatidae	Bucephala	Bucephala clangula	waterfowl	Confirmed Host
Anseriformes	Anatidae	Bucephala	Bucephala islandica	waterfowl	Suspected Host
Procellariiformes	Procellariidae	Bulweria	Bulweria bulwerii	seabirds	Suspected Host
Charadriiformes	Burhinidae	Burhinus	Burhinus bistriatus	shorebirds	Suspected Host
Charadriiformes	Burhinidae	Burhinus	Burhinus capensis	shorebirds	Suspected Host
Charadriiformes	Burhinidae	Burhinus	Burhinus grallarius	shorebirds	Suspected Host
Charadriiformes	Burhinidae	Burhinus	Burhinus indicus	shorebirds	Suspected Host
Charadriiformes	Burhinidae	Burhinus	Burhinus oedicnemus	shorebirds	Suspected Host
Charadriiformes	Burhinidae	Burhinus	Burhinus senegalensis	shorebirds	Suspected Host
Charadriiformes	Burhinidae	Burhinus	Burhinus vermiculatus	shorebirds	Suspected Host
Pelecaniformes	Ardeidae	Butorides	Butorides striata	Large wading birds	Suspected Host
Pelecaniformes	Ardeidae	Butorides	Butorides virescens	Large wading birds	Confirmed Host
Anseriformes	Anatidae	Cairina	Cairina moschata	waterfowl	Confirmed Host
Charadriiformes	Scolopacidae	Calidris	Calidris acuminata	shorebirds	Suspected Host
Charadriiformes	Scolopacidae	Calidris	Calidris alba	shorebirds	Confirmed Host
Charadriiformes	Scolopacidae	Calidris	Calidris alpina	shorebirds	Confirmed Host
Charadriiformes	Scolopacidae	Calidris	Calidris bairdii	shorebirds	Suspected Host
Charadriiformes	Scolopacidae	Calidris	Calidris canutus	shorebirds	Confirmed Host
Charadriiformes	Scolopacidae	Calidris	Calidris falcinellus	shorebirds	Suspected Host
Charadriiformes	Scolopacidae	Calidris	Calidris ferruginea	shorebirds	Suspected Host
Charadriiformes	Scolopacidae	Calidris	Calidris fuscicollis	shorebirds	Confirmed Host
Charadriiformes	Scolopacidae	Calidris	Calidris himantopus	shorebirds	Suspected Host
Charadriiformes	Scolopacidae	Calidris	Calidris maritima	shorebirds	Suspected Host
Charadriiformes	Scolopacidae	Calidris	Calidris mauri	shorebirds	Suspected Host
Charadriiformes	Scolopacidae	Calidris	Calidris melanotos	shorebirds	Suspected Host
Charadriiformes	Scolopacidae	Calidris	Calidris minuta	shorebirds	Suspected Host
Charadriiformes	Scolopacidae	Calidris	Calidris minutilla	shorebirds	Confirmed Host
Charadriiformes	Scolopacidae	Calidris	Calidris ptilocnemis	shorebirds	Suspected Host
Charadriiformes	Scolopacidae	Calidris	Calidris pugnax	shorebirds	Suspected Host
Charadriiformes	Scolopacidae	Calidris	Calidris pusilla	shorebirds	Confirmed Host
Charadriiformes	Scolopacidae	Calidris	Calidris pygmaea	shorebirds	Suspected Host
Charadriiformes	Scolopacidae	Calidris	Calidris ruficollis	shorebirds	Confirmed Host
Charadriiformes	Scolopacidae	Calidris	Calidris subminuta	shorebirds	Suspected Host
Charadriiformes	Scolopacidae	Calidris	Calidris subruficollis	shorebirds	Suspected Host
Charadriiformes	Scolopacidae	Calidris	Calidris temminckii	shorebirds	Suspected Host
Charadriiformes	Scolopacidae	Calidris	Calidris tenuirostris	shorebirds	Suspected Host
Charadriiformes	Scolopacidae	Calidris	Calidris virgata	shorebirds	Suspected Host
Anseriformes	Anatidae	Callonetta	Callonetta leucophrys	waterfowl	Suspected Host
Procellariiformes	Procellariidae	Calonectris	Calonectris diomedea	seabirds	Suspected Host
Procellariiformes	Procellariidae	Calonectris	Calonectris leucomelas	seabirds	Suspected Host
Charadriiformes	Alcidae	Cepphus	Cepphus carbo	seabirds	Suspected Host
Charadriiformes	Alcidae	Cepphus	Cepphus columba	seabirds	Suspected Host
Charadriiformes	Alcidae	Cepphus	Cepphus grylle	seabirds	Suspected Host
Pelecaniformes	Threskiornithidae	Cercibis	Cercibis oxycerca	Large wading birds	Suspected Host
Anseriformes	Anatidae	Cereopsis	Cereopsis novaehollandiae	waterfowl	Suspected Host
Charadriiformes	Alcidae	Cerorhinca	Cerorhinca monocerata	seabirds	Suspected Host
Charadriiformes	Charadriidae	Charadrius	Charadrius alexandrinus	shorebirds	Suspected Host
Charadriiformes	Charadriidae	Charadrius	Charadrius asiaticus	shorebirds	Suspected Host
Charadriiformes	Charadriidae	Charadrius	Charadrius bicinctus	shorebirds	Suspected Host
Charadriiformes	Charadriidae	Charadrius	Charadrius collaris	shorebirds	Suspected Host
Charadriiformes	Charadriidae	Charadrius	Charadrius dealbatus	shorebirds	Suspected Host
Charadriiformes	Charadriidae	Charadrius	Charadrius dubius	shorebirds	Suspected Host
Charadriiformes	Charadriidae	Charadrius	Charadrius falklandicus	shorebirds	Suspected Host
Charadriiformes	Charadriidae	Charadrius	Charadrius forbesi	shorebirds	Suspected Host
Charadriiformes	Charadriidae	Charadrius	Charadrius hiaticula	shorebirds	Suspected Host
Charadriiformes	Charadriidae	Charadrius	Charadrius leschenaultii	shorebirds	Suspected Host
Charadriiformes	Charadriidae	Charadrius	Charadrius marginatus	shorebirds	Suspected Host
Charadriiformes	Charadriidae	Charadrius	Charadrius melodus	shorebirds	Suspected Host
Charadriiformes	Charadriidae	Charadrius	Charadrius modestus	shorebirds	Suspected Host
Charadriiformes	Charadriidae	Charadrius	Charadrius mongolus	shorebirds	Suspected Host
Charadriiformes	Charadriidae	Charadrius	Charadrius montanus	shorebirds	Suspected Host
Charadriiformes	Charadriidae	Charadrius	Charadrius nivosus	shorebirds	Confirmed Host
Charadriiformes	Charadriidae	Charadrius	Charadrius pallidus	shorebirds	Suspected Host
Charadriiformes	Charadriidae	Charadrius	Charadrius pecuarius	shorebirds	Suspected Host
Charadriiformes	Charadriidae	Charadrius	Charadrius peronii	shorebirds	Suspected Host
Charadriiformes	Charadriidae	Charadrius	Charadrius placidus	shorebirds	Suspected Host
Charadriiformes	Charadriidae	Charadrius	Charadrius ruficapillus	shorebirds	Suspected Host
Charadriiformes	Charadriidae	Charadrius	Charadrius semipalmatus	shorebirds	Suspected Host
Charadriiformes	Charadriidae	Charadrius	Charadrius thoracicus	shorebirds	Suspected Host
Charadriiformes	Charadriidae	Charadrius	Charadrius tricollaris	shorebirds	Suspected Host
Charadriiformes	Charadriidae	Charadrius	Charadrius veredus	shorebirds	Suspected Host
Charadriiformes	Charadriidae	Charadrius	Charadrius vociferus	shorebirds	Suspected Host
Charadriiformes	Charadriidae	Charadrius	Charadrius wilsonia	shorebirds	Suspected Host
Anseriformes	Anhimidae	Chauna	Chauna torquata	waterfowl	Suspected Host
Anseriformes	Anatidae	Chenonetta	Chenonetta jubata	waterfowl	Suspected Host
Charadriiformes	Chionidae	Chionis	Chionis albus	shorebirds	Suspected Host
Charadriiformes	Laridae	Chlidonias	Chlidonias albostriatus	seabirds	Suspected Host
Charadriiformes	Laridae	Chlidonias	Chlidonias hybrida	seabirds	Suspected Host
Charadriiformes	Laridae	Chlidonias	Chlidonias leucopterus	seabirds	Suspected Host
Charadriiformes	Laridae	Chlidonias	Chlidonias niger	seabirds	Suspected Host
Anseriformes	Anatidae	Chloephaga	Chloephaga hybrida	waterfowl	Suspected Host
Anseriformes	Anatidae	Chloephaga	Chloephaga melanoptera	waterfowl	Suspected Host
Anseriformes	Anatidae	Chloephaga	Chloephaga picta	waterfowl	Suspected Host
Anseriformes	Anatidae	Chloephaga	Chloephaga poliocephala	waterfowl	Suspected Host
Anseriformes	Anatidae	Chloephaga	Chloephaga rubidiceps	waterfowl	Suspected Host
Charadriiformes	Laridae	Chroicocephalus	Chroicocephalus brunnicephalus	seabirds	Confirmed Host
Charadriiformes	Laridae	Chroicocephalus	Chroicocephalus bulleri	seabirds	Suspected Host
Charadriiformes	Laridae	Chroicocephalus	Chroicocephalus cirrocephalus	seabirds	Confirmed Host
Charadriiformes	Laridae	Chroicocephalus	Chroicocephalus genei	seabirds	Suspected Host
Charadriiformes	Laridae	Chroicocephalus	Chroicocephalus hartlaubii	seabirds	Suspected Host
Charadriiformes	Laridae	Chroicocephalus	Chroicocephalus novaehollandiae	seabirds	Confirmed Host
Charadriiformes	Laridae	Chroicocephalus	Chroicocephalus philadelphia	seabirds	Confirmed Host
Charadriiformes	Laridae	Chroicocephalus	Chroicocephalus ridibundus	seabirds	Confirmed Host
Ciconiiformes	Ciconiidae	Ciconia	Ciconia abdimii	Large wading birds	Suspected Host
Ciconiiformes	Ciconiidae	Ciconia	Ciconia boyciana	Large wading birds	Confirmed Host
Ciconiiformes	Ciconiidae	Ciconia	Ciconia ciconia	Large wading birds	Suspected Host
Ciconiiformes	Ciconiidae	Ciconia	Ciconia episcopus	Large wading birds	Suspected Host
Ciconiiformes	Ciconiidae	Ciconia	Ciconia maguari	Large wading birds	Suspected Host
Ciconiiformes	Ciconiidae	Ciconia	Ciconia microscelis	Large wading birds	Suspected Host
Ciconiiformes	Ciconiidae	Ciconia	Ciconia nigra	Large wading birds	Suspected Host
Charadriiformes	Recurvirostridae	Cladorhynchus	Cladorhynchus leucocephalus	shorebirds	Suspected Host
Anseriformes	Anatidae	Clangula	Clangula hyemalis	waterfowl	Confirmed Host
Pelecaniformes	Ardeidae	Cochlearius	Cochlearius cochlearius	Large wading birds	Suspected Host
Anseriformes	Anatidae	Coscoroba	Coscoroba coscoroba	waterfowl	Suspected Host
Gruiformes	Rallidae	Crex	Crex crex	Large wading birds	Suspected Host
Gruiformes	Rallidae	Crex	Crex egregia	Large wading birds	Suspected Host
Charadriiformes	Glareolidae	Cursorius	Cursorius coromandelicus	shorebirds	Suspected Host
Charadriiformes	Glareolidae	Cursorius	Cursorius cursor	shorebirds	Suspected Host
Charadriiformes	Glareolidae	Cursorius	Cursorius rufus	shorebirds	Suspected Host
Charadriiformes	Glareolidae	Cursorius	Cursorius somalensis	shorebirds	Suspected Host
Charadriiformes	Glareolidae	Cursorius	Cursorius temminckii	shorebirds	Suspected Host
Anseriformes	Anatidae	Cygnus	Cygnus atratus	waterfowl	Confirmed Host
Anseriformes	Anatidae	Cygnus	Cygnus buccinator	waterfowl	Confirmed Host
Anseriformes	Anatidae	Cygnus	Cygnus columbianus	waterfowl	Confirmed Host
Anseriformes	Anatidae	Cygnus	Cygnus cygnus	waterfowl	Confirmed Host
Anseriformes	Anatidae	Cygnus	Cygnus melancoryphus	waterfowl	Suspected Host
Anseriformes	Anatidae	Cygnus	Cygnus olor	waterfowl	Confirmed Host
Procellariiformes	Procellariidae	Daption	Daption capense	seabirds	Suspected Host
Anseriformes	Anatidae	Dendrocygna	Dendrocygna arcuata	waterfowl	Suspected Host
Anseriformes	Anatidae	Dendrocygna	Dendrocygna autumnalis	waterfowl	Confirmed Host
Anseriformes	Anatidae	Dendrocygna	Dendrocygna bicolor	waterfowl	Confirmed Host
Anseriformes	Anatidae	Dendrocygna	Dendrocygna eytoni	waterfowl	Suspected Host
Anseriformes	Anatidae	Dendrocygna	Dendrocygna guttata	waterfowl	Suspected Host
Anseriformes	Anatidae	Dendrocygna	Dendrocygna javanica	waterfowl	Suspected Host
Anseriformes	Anatidae	Dendrocygna	Dendrocygna viduata	waterfowl	Confirmed Host
Procellariiformes	Diomedeidae	Diomedea	Diomedea antipodensis	seabirds	Suspected Host
Procellariiformes	Diomedeidae	Diomedea	Diomedea epomophora	seabirds	Suspected Host
Procellariiformes	Diomedeidae	Diomedea	Diomedea exulans	seabirds	Suspected Host
Procellariiformes	Diomedeidae	Diomedea	Diomedea sanfordi	seabirds	Suspected Host
Charadriiformes	Dromadidae	Dromas	Dromas ardeola	shorebirds	Suspected Host
Gruiformes	Rallidae	Dryolimnas	Dryolimnas cuvieri	Large wading birds	Suspected Host
Pelecaniformes	Ardeidae	Egretta	Egretta ardesiaca	Large wading birds	Suspected Host
Pelecaniformes	Ardeidae	Egretta	Egretta caerulea	Large wading birds	Suspected Host
Pelecaniformes	Ardeidae	Egretta	Egretta dimorpha	Large wading birds	Suspected Host
Pelecaniformes	Ardeidae	Egretta	Egretta eulophotes	Large wading birds	Suspected Host
Pelecaniformes	Ardeidae	Egretta	Egretta garzetta	Large wading birds	Suspected Host
Pelecaniformes	Ardeidae	Egretta	Egretta gularis	Large wading birds	Suspected Host
Pelecaniformes	Ardeidae	Egretta	Egretta intermedia	Large wading birds	Suspected Host
Pelecaniformes	Ardeidae	Egretta	Egretta novaehollandiae	Large wading birds	Suspected Host
Pelecaniformes	Ardeidae	Egretta	Egretta picata	Large wading birds	Suspected Host
Pelecaniformes	Ardeidae	Egretta	Egretta rufescens	Large wading birds	Suspected Host
Pelecaniformes	Ardeidae	Egretta	Egretta sacra	Large wading birds	Suspected Host
Pelecaniformes	Ardeidae	Egretta	Egretta thula	Large wading birds	Confirmed Host
Pelecaniformes	Ardeidae	Egretta	Egretta tricolor	Large wading birds	Suspected Host
Pelecaniformes	Ardeidae	Egretta	Egretta vinaceigula	Large wading birds	Suspected Host
Charadriiformes	Charadriidae	Elseyornis	Elseyornis melanops	shorebirds	Suspected Host
Ciconiiformes	Ciconiidae	Ephippiorhynchus	Ephippiorhynchus asiaticus	others	Suspected Host
Ciconiiformes	Ciconiidae	Ephippiorhynchus	Ephippiorhynchus senegalensis	others	Suspected Host
Charadriiformes	Charadriidae	Erythrogonys	Erythrogonys cinctus	shorebirds	Suspected Host
Charadriiformes	Burhinidae	Esacus	Esacus magnirostris	shorebirds	Suspected Host
Charadriiformes	Burhinidae	Esacus	Esacus recurvirostris	shorebirds	Suspected Host
Pelecaniformes	Threskiornithidae	Eudocimus	Eudocimus albus	Large wading birds	Confirmed Host
Pelecaniformes	Threskiornithidae	Eudocimus	Eudocimus ruber	Large wading birds	Suspected Host
Sphenisciformes	Spheniscidae	Eudyptes	Eudyptes chrysocome	seabirds	Suspected Host
Sphenisciformes	Spheniscidae	Eudyptes	Eudyptes chrysolophus	seabirds	Suspected Host
Sphenisciformes	Spheniscidae	Eudyptes	Eudyptes pachyrhynchus	seabirds	Suspected Host
Sphenisciformes	Spheniscidae	Eudyptula	Eudyptula minor	seabirds	Suspected Host
Gruiformes	Rallidae	Eulabeornis	Eulabeornis castaneoventris	others	Suspected Host
Charadriiformes	Alcidae	Fratercula	Fratercula arctica	seabirds	Suspected Host
Charadriiformes	Alcidae	Fratercula	Fratercula cirrhata	seabirds	Suspected Host
Charadriiformes	Alcidae	Fratercula	Fratercula corniculata	seabirds	Suspected Host
Suliformes	Fregatidae	Fregata	Fregata ariel	seabirds	Suspected Host
Suliformes	Fregatidae	Fregata	Fregata magnificens	seabirds	Suspected Host
Suliformes	Fregatidae	Fregata	Fregata minor	seabirds	Suspected Host
Procellariiformes	Hydrobatidae	Fregetta	Fregetta tropica	seabirds	Suspected Host
Gruiformes	Rallidae	Fulica	Fulica americana	Large wading birds	Confirmed Host
Gruiformes	Rallidae	Fulica	Fulica ardesiaca	Large wading birds	Suspected Host
Gruiformes	Rallidae	Fulica	Fulica armillata	Large wading birds	Suspected Host
Gruiformes	Rallidae	Fulica	Fulica atra	Large wading birds	Suspected Host
Gruiformes	Rallidae	Fulica	Fulica cristata	Large wading birds	Suspected Host
Gruiformes	Rallidae	Fulica	Fulica gigantea	Large wading birds	Suspected Host
Gruiformes	Rallidae	Fulica	Fulica leucoptera	Large wading birds	Suspected Host
Gruiformes	Rallidae	Fulica	Fulica rufifrons	Large wading birds	Suspected Host
Procellariiformes	Procellariidae	Fulmarus	Fulmarus glacialis	seabirds	Confirmed Host
Procellariiformes	Procellariidae	Fulmarus	Fulmarus glacialoides	seabirds	Suspected Host
Gruiformes	Rallidae	Gallicrex	Gallicrex cinerea	Large wading birds	Suspected Host
Charadriiformes	Scolopacidae	Gallinago	Gallinago delicata	shorebirds	Suspected Host
Charadriiformes	Scolopacidae	Gallinago	Gallinago gallinago	shorebirds	Confirmed Host
Charadriiformes	Scolopacidae	Gallinago	Gallinago hardwickii	shorebirds	Suspected Host
Charadriiformes	Scolopacidae	Gallinago	Gallinago macrodactyla	shorebirds	Suspected Host
Charadriiformes	Scolopacidae	Gallinago	Gallinago media	shorebirds	Suspected Host
Charadriiformes	Scolopacidae	Gallinago	Gallinago megala	shorebirds	Suspected Host
Charadriiformes	Scolopacidae	Gallinago	Gallinago nigripennis	shorebirds	Suspected Host
Charadriiformes	Scolopacidae	Gallinago	Gallinago paraguaiae	shorebirds	Suspected Host
Charadriiformes	Scolopacidae	Gallinago	Gallinago stenura	shorebirds	Suspected Host
Gruiformes	Rallidae	Gallinula	Gallinula angulata	Large wading birds	Suspected Host
Gruiformes	Rallidae	Gallinula	Gallinula chloropus	Large wading birds	Confirmed Host
Gruiformes	Rallidae	Gallinula	Gallinula tenebrosa	Large wading birds	Suspected Host
Gruiformes	Rallidae	Gallirallus	Gallirallus australis	Large wading birds	Suspected Host
Procellariiformes	Hydrobatidae	Garrodia	Garrodia nereis	seabirds	Suspected Host
Gaviiformes	Gaviidae	Gavia	Gavia adamsii	others	Suspected Host
Gaviiformes	Gaviidae	Gavia	Gavia arctica	others	Suspected Host
Gaviiformes	Gaviidae	Gavia	Gavia immer	others	Confirmed Host
Gaviiformes	Gaviidae	Gavia	Gavia pacifica	others	Confirmed Host
Gaviiformes	Gaviidae	Gavia	Gavia stellata	others	Suspected Host
Charadriiformes	Laridae	Gelochelidon	Gelochelidon macrotarsa	seabirds	Suspected Host
Charadriiformes	Laridae	Gelochelidon	Gelochelidon nilotica	seabirds	Confirmed Host
Pelecaniformes	Threskiornithidae	Geronticus	Geronticus calvus	Large wading birds	Suspected Host
Pelecaniformes	Threskiornithidae	Geronticus	Geronticus eremita	Large wading birds	Suspected Host
Charadriiformes	Glareolidae	Glareola	Glareola cinerea	seabirds	Suspected Host
Charadriiformes	Glareolidae	Glareola	Glareola lactea	shorebirds	Suspected Host
Charadriiformes	Glareolidae	Glareola	Glareola maldivarum	shorebirds	Suspected Host
Charadriiformes	Glareolidae	Glareola	Glareola nordmanni	shorebirds	Suspected Host
Charadriiformes	Glareolidae	Glareola	Glareola nuchalis	shorebirds	Suspected Host
Charadriiformes	Glareolidae	Glareola	Glareola ocularis	seabirds	Suspected Host
Charadriiformes	Glareolidae	Glareola	Glareola pratincola	shorebirds	Suspected Host
Pelecaniformes	Ardeidae	Gorsachius	Gorsachius leuconotus	Large wading birds	Suspected Host
Pelecaniformes	Ardeidae	Gorsachius	Gorsachius melanolophus	Large wading birds	Suspected Host
Gruiformes	Gruidae	Grus	Grus americana	Large wading birds	Suspected Host
Gruiformes	Gruidae	Grus	Grus grus	Large wading birds	Suspected Host
Gruiformes	Gruidae	Grus	Grus japonensis	Large wading birds	Suspected Host
Gruiformes	Gruidae	Grus	Grus nigricollis	Large wading birds	Suspected Host
Charadriiformes	Laridae	Gygis	Gygis alba	seabirds	Suspected Host
Charadriiformes	Haematopodidae	Haematopus	Haematopus ater	shorebirds	Suspected Host
Charadriiformes	Haematopodidae	Haematopus	Haematopus bachmani	shorebirds	Suspected Host
Charadriiformes	Haematopodidae	Haematopus	Haematopus finschi	shorebirds	Suspected Host
Charadriiformes	Haematopodidae	Haematopus	Haematopus fuliginosus	shorebirds	Suspected Host
Charadriiformes	Haematopodidae	Haematopus	Haematopus leucopodus	shorebirds	Suspected Host
Charadriiformes	Haematopodidae	Haematopus	Haematopus longirostris	shorebirds	Suspected Host
Charadriiformes	Haematopodidae	Haematopus	Haematopus moquini	shorebirds	Suspected Host
Charadriiformes	Haematopodidae	Haematopus	Haematopus ostralegus	shorebirds	Suspected Host
Charadriiformes	Haematopodidae	Haematopus	Haematopus palliatus	shorebirds	Suspected Host
Charadriiformes	Haematopodidae	Haematopus	Haematopus unicolor	shorebirds	Suspected Host
Accipitriformes	Accipitridae	Haliaeetus	Haliaeetus albicilla	others	Confirmed Host
Accipitriformes	Accipitridae	Haliaeetus	Haliaeetus leucocephalus	others	Confirmed Host
Accipitriformes	Accipitridae	Haliaeetus	Haliaeetus leucogaster	others	Suspected Host
Accipitriformes	Accipitridae	Haliaeetus	Haliaeetus leucoryphus	others	Suspected Host
Accipitriformes	Accipitridae	Haliaeetus	Haliaeetus pelagicus	others	Suspected Host
Accipitriformes	Accipitridae	Haliaeetus	Haliaeetus vocifer	others	Suspected Host
Accipitriformes	Accipitridae	Haliaeetus	Haliaeetus vociferoides	others	Suspected Host
Procellariiformes	Procellariidae	Halobaena	Halobaena caerulea	seabirds	Suspected Host
Anseriformes	Anatidae	Heteronetta	Heteronetta atricapilla	waterfowl	Suspected Host
Charadriiformes	Recurvirostridae	Himantopus	Himantopus himantopus	shorebirds	Confirmed Host
Charadriiformes	Recurvirostridae	Himantopus	Himantopus leucocephalus	shorebirds	Suspected Host
Charadriiformes	Recurvirostridae	Himantopus	Himantopus mexicanus	shorebirds	Suspected Host
Gruiformes	Rallidae	Himantornis	Himantornis haematopus	others	Suspected Host
Anseriformes	Anatidae	Histrionicus	Histrionicus histrionicus	waterfowl	Suspected Host
Charadriiformes	Charadriidae	Hoploxypterus	Hoploxypterus cayanus	shorebirds	Suspected Host
Procellariiformes	Hydrobatidae	Hydrobates	Hydrobates melania	seabirds	Suspected Host
Procellariiformes	Hydrobatidae	Hydrobates	Hydrobates pelagicus	seabirds	Suspected Host
Charadriiformes	Laridae	Hydrocoloeus	Hydrocoloeus minutus	seabirds	Confirmed Host
Charadriiformes	Jacanidae	Hydrophasianus	Hydrophasianus chirurgus	shorebirds	Suspected Host
Charadriiformes	Laridae	Hydroprogne	Hydroprogne caspia	seabirds	Confirmed Host
Anseriformes	Anatidae	Hymenolaimus	Hymenolaimus malacorhynchos	waterfowl	Suspected Host
Charadriiformes	Ibidorhynchidae	Ibidorhyncha	Ibidorhyncha struthersii	shorebirds	Suspected Host
Charadriiformes	Laridae	Ichthyaetus	Ichthyaetus audouinii	seabirds	Suspected Host
Charadriiformes	Laridae	Ichthyaetus	Ichthyaetus hemprichii	seabirds	Suspected Host
Charadriiformes	Laridae	Ichthyaetus	Ichthyaetus ichthyaetus	seabirds	Confirmed Host
Charadriiformes	Laridae	Ichthyaetus	Ichthyaetus leucophthalmus	seabirds	Suspected Host
Charadriiformes	Laridae	Ichthyaetus	Ichthyaetus melanocephalus	seabirds	Confirmed Host
Charadriiformes	Jacanidae	Irediparra	Irediparra gallinacea	shorebirds	Suspected Host
Pelecaniformes	Ardeidae	Ixobrychus	Ixobrychus cinnamomeus	Large wading birds	Suspected Host
Pelecaniformes	Ardeidae	Ixobrychus	Ixobrychus dubius	Large wading birds	Suspected Host
Pelecaniformes	Ardeidae	Ixobrychus	Ixobrychus eurhythmus	Large wading birds	Suspected Host
Pelecaniformes	Ardeidae	Ixobrychus	Ixobrychus exilis	Large wading birds	Suspected Host
Pelecaniformes	Ardeidae	Ixobrychus	Ixobrychus involucris	Large wading birds	Suspected Host
Pelecaniformes	Ardeidae	Ixobrychus	Ixobrychus minutus	Large wading birds	Suspected Host
Pelecaniformes	Ardeidae	Ixobrychus	Ixobrychus sinensis	Large wading birds	Suspected Host
Pelecaniformes	Ardeidae	Ixobrychus	Ixobrychus sturmii	Large wading birds	Suspected Host
Ciconiiformes	Ciconiidae	Jabiru	Jabiru mycteria	others	Suspected Host
Charadriiformes	Jacanidae	Jacana	Jacana jacana	shorebirds	Suspected Host
Charadriiformes	Jacanidae	Jacana	Jacana spinosa	shorebirds	Suspected Host
Strigiformes	Strigidae	Ketupa	Ketupa ketupu	others	Suspected Host
Strigiformes	Strigidae	Ketupa	Ketupa zeylonensis	others	Suspected Host
Charadriiformes	Laridae	Larus	Larus argentatus	seabirds	Confirmed Host
Charadriiformes	Laridae	Larus	Larus armenicus	seabirds	Confirmed Host
Charadriiformes	Laridae	Larus	Larus cachinnans	seabirds	Confirmed Host
Charadriiformes	Laridae	Larus	Larus californicus	seabirds	Confirmed Host
Charadriiformes	Laridae	Larus	Larus canus	seabirds	Confirmed Host
Charadriiformes	Laridae	Larus	Larus crassirostris	seabirds	Confirmed Host
Charadriiformes	Laridae	Larus	Larus delawarensis	seabirds	Confirmed Host
Charadriiformes	Laridae	Larus	Larus dominicanus	seabirds	Confirmed Host
Charadriiformes	Laridae	Larus	Larus fuscus	seabirds	Confirmed Host
Charadriiformes	Laridae	Larus	Larus glaucescens	seabirds	Confirmed Host
Charadriiformes	Laridae	Larus	Larus glaucoides	seabirds	Confirmed Host
Charadriiformes	Laridae	Larus	Larus heermanni	seabirds	Suspected Host
Charadriiformes	Laridae	Larus	Larus hyperboreus	seabirds	Confirmed Host
Charadriiformes	Laridae	Larus	Larus livens	seabirds	Suspected Host
Charadriiformes	Laridae	Larus	Larus marinus	seabirds	Confirmed Host
Charadriiformes	Laridae	Larus	Larus michahellis	seabirds	Confirmed Host
Charadriiformes	Laridae	Larus	Larus occidentalis	seabirds	Confirmed Host
Charadriiformes	Laridae	Larus	Larus pacificus	seabirds	Suspected Host
Charadriiformes	Laridae	Larus	Larus schistisagus	seabirds	Confirmed Host
Charadriiformes	Laridae	Larus	Larus smithsonianus	seabirds	Confirmed Host
Charadriiformes	Laridae	Larus	Larus vegae	seabirds	Suspected Host
Gruiformes	Rallidae	Laterallus	Laterallus albigularis	Large wading birds	Suspected Host
Gruiformes	Rallidae	Laterallus	Laterallus melanophaius	Large wading birds	Suspected Host
Ciconiiformes	Ciconiidae	Leptoptilos	Leptoptilos crumenifer	others	Suspected Host
Ciconiiformes	Ciconiidae	Leptoptilos	Leptoptilos javanicus	others	Suspected Host
Charadriiformes	Laridae	Leucophaeus	Leucophaeus atricilla	seabirds	Confirmed Host
Charadriiformes	Laridae	Leucophaeus	Leucophaeus pipixcan	shorebirds	Confirmed Host
Gruiformes	Rallidae	Lewinia	Lewinia pectoralis	Large wading birds	Suspected Host
Charadriiformes	Scolopacidae	Limnodromus	Limnodromus griseus	shorebirds	Suspected Host
Charadriiformes	Scolopacidae	Limnodromus	Limnodromus scolopaceus	shorebirds	Suspected Host
Charadriiformes	Scolopacidae	Limnodromus	Limnodromus semipalmatus	shorebirds	Suspected Host
Charadriiformes	Scolopacidae	Limosa	Limosa fedoa	shorebirds	Suspected Host
Charadriiformes	Scolopacidae	Limosa	Limosa haemastica	shorebirds	Suspected Host
Charadriiformes	Scolopacidae	Limosa	Limosa lapponica	shorebirds	Suspected Host
Charadriiformes	Scolopacidae	Limosa	Limosa limosa	shorebirds	Suspected Host
Anseriformes	Anatidae	Lophodytes	Lophodytes cucullatus	waterfowl	Confirmed Host
Anseriformes	Anatidae	Lophonetta	Lophonetta specularioides	waterfowl	Suspected Host
Pelecaniformes	Threskiornithidae	Lophotibis	Lophotibis cristata	Large wading birds	Suspected Host
Charadriiformes	Scolopacidae	Lymnocryptes	Lymnocryptes minimus	shorebirds	Suspected Host
Procellariiformes	Procellariidae	Macronectes	Macronectes giganteus	seabirds	Suspected Host
Procellariiformes	Procellariidae	Macronectes	Macronectes halli	seabirds	Suspected Host
Anseriformes	Anatidae	Malacorhynchus	Malacorhynchus membranaceus	waterfowl	Confirmed Host
Anseriformes	Anatidae	Mareca	Mareca americana	waterfowl	Confirmed Host
Anseriformes	Anatidae	Mareca	Mareca falcata	waterfowl	Confirmed Host
Anseriformes	Anatidae	Mareca	Mareca penelope	waterfowl	Confirmed Host
Anseriformes	Anatidae	Mareca	Mareca sibilatrix	waterfowl	Confirmed Host
Anseriformes	Anatidae	Mareca	Mareca strepera	waterfowl	Confirmed Host
Anseriformes	Anatidae	Marmaronetta	Marmaronetta angustirostris	waterfowl	Suspected Host
Sphenisciformes	Spheniscidae	Megadyptes	Megadyptes antipodes	seabirds	Suspected Host
Anseriformes	Anatidae	Melanitta	Melanitta americana	waterfowl	Suspected Host
Anseriformes	Anatidae	Melanitta	Melanitta deglandi	waterfowl	Confirmed Host
Anseriformes	Anatidae	Melanitta	Melanitta fusca	waterfowl	Confirmed Host
Anseriformes	Anatidae	Melanitta	Melanitta nigra	waterfowl	Confirmed Host
Anseriformes	Anatidae	Melanitta	Melanitta perspicillata	waterfowl	Confirmed Host
Anseriformes	Anatidae	Melanitta	Melanitta stejnegeri	waterfowl	Suspected Host
Gruiformes	Rallidae	Mentocrex	Mentocrex kioloides	others	Suspected Host
Anseriformes	Anatidae	Merganetta	Merganetta armata	waterfowl	Suspected Host
Anseriformes	Anatidae	Mergellus	Mergellus albellus	waterfowl	Confirmed Host
Anseriformes	Anatidae	Mergus	Mergus merganser	waterfowl	Confirmed Host
Anseriformes	Anatidae	Mergus	Mergus serrator	waterfowl	Suspected Host
Anseriformes	Anatidae	Mergus	Mergus squamatus	waterfowl	Confirmed Host
Pelecaniformes	Threskiornithidae	Mesembrinibis	Mesembrinibis cayennensis	Large wading birds	Suspected Host
Charadriiformes	Jacanidae	Metopidius	Metopidius indicus	shorebirds	Suspected Host
Suliformes	Phalacrocoracidae	Microcarbo	Microcarbo africanus	seabirds	Suspected Host
Pelecaniformes	Phalacrocoracidae	Microcarbo	Microcarbo coronatus	seabirds	Suspected Host
Suliformes	Phalacrocoracidae	Microcarbo	Microcarbo melanoleucos	seabirds	Suspected Host
Suliformes	Phalacrocoracidae	Microcarbo	Microcarbo niger	seabirds	Suspected Host
Suliformes	Phalacrocoracidae	Microcarbo	Microcarbo pygmaeus	seabirds	Suspected Host
Charadriiformes	Jacanidae	Microparra	Microparra capensis	shorebirds	Suspected Host
Suliformes	Sulidae	Morus	Morus bassanus	seabirds	Confirmed Host
Suliformes	Sulidae	Morus	Morus capensis	seabirds	Suspected Host
Suliformes	Sulidae	Morus	Morus serrator	seabirds	Suspected Host
Ciconiiformes	Ciconiidae	Mycteria	Mycteria americana	others	Confirmed Host
Ciconiiformes	Ciconiidae	Mycteria	Mycteria ibis	others	Suspected Host
Ciconiiformes	Ciconiidae	Mycteria	Mycteria leucocephala	others	Suspected Host
Anseriformes	Anatidae	Netta	Netta erythrophthalma	waterfowl	Suspected Host
Anseriformes	Anatidae	Netta	Netta peposaca	waterfowl	Confirmed Host
Anseriformes	Anatidae	Netta	Netta rufina	waterfowl	Confirmed Host
Anseriformes	Anatidae	Nettapus	Nettapus auritus	waterfowl	Suspected Host
Anseriformes	Anatidae	Nettapus	Nettapus coromandelianus	waterfowl	Suspected Host
Anseriformes	Anatidae	Nettapus	Nettapus pulchellus	waterfowl	Suspected Host
Anseriformes	Anatidae	Nomonyx	Nomonyx dominicus	waterfowl	Suspected Host
Charadriiformes	Scolopacidae	Numenius	Numenius americanus	shorebirds	Suspected Host
Charadriiformes	Scolopacidae	Numenius	Numenius arquata	shorebirds	Confirmed Host
Charadriiformes	Scolopacidae	Numenius	Numenius madagascariensis	shorebirds	Confirmed Host
Charadriiformes	Scolopacidae	Numenius	Numenius minutus	shorebirds	Suspected Host
Charadriiformes	Scolopacidae	Numenius	Numenius phaeopus	shorebirds	Confirmed Host
Pelecaniformes	Ardeidae	Nyctanassa	Nyctanassa violacea	Large wading birds	Suspected Host
Pelecaniformes	Ardeidae	Nycticorax	Nycticorax caledonicus	Large wading birds	Suspected Host
Pelecaniformes	Ardeidae	Nycticorax	Nycticorax nycticorax	Large wading birds	Confirmed Host
Charadriiformes	Rostratulidae	Nycticryphes	Nycticryphes semicollaris	shorebirds	Suspected Host
Procellariiformes	Hydrobatidae	Oceanites	Oceanites gracilis	seabirds	Suspected Host
Procellariiformes	Hydrobatidae	Oceanites	Oceanites oceanicus	seabirds	Suspected Host
Charadriiformes	Laridae	Onychoprion	Onychoprion anaethetus	seabirds	Suspected Host
Charadriiformes	Laridae	Onychoprion	Onychoprion fuscatus	seabirds	Confirmed Host
Charadriiformes	Charadriidae	Oreopholus	Oreopholus ruficollis	shorebirds	Suspected Host
Anseriformes	Anatidae	Oxyura	Oxyura australis	waterfowl	Suspected Host
Anseriformes	Anatidae	Oxyura	Oxyura ferruginea	waterfowl	Suspected Host
Anseriformes	Anatidae	Oxyura	Oxyura jamaicensis	waterfowl	Confirmed Host
Anseriformes	Anatidae	Oxyura	Oxyura leucocephala	waterfowl	Confirmed Host
Anseriformes	Anatidae	Oxyura	Oxyura maccoa	waterfowl	Suspected Host
Anseriformes	Anatidae	Oxyura	Oxyura vittata	waterfowl	Suspected Host
Procellariiformes	Procellariidae	Pachyptila	Pachyptila belcheri	seabirds	Suspected Host
Procellariiformes	Procellariidae	Pachyptila	Pachyptila desolata	seabirds	Suspected Host
Procellariiformes	Procellariidae	Pachyptila	Pachyptila salvini	seabirds	Suspected Host
Procellariiformes	Procellariidae	Pachyptila	Pachyptila turtur	seabirds	Suspected Host
Procellariiformes	Procellariidae	Pagodroma	Pagodroma nivea	seabirds	Suspected Host
Charadriiformes	Laridae	Pagophila	Pagophila eburnea	seabirds	Suspected Host
Accipitriformes	Pandionidae	Pandion	Pandion haliaetus	others	Confirmed Host
Gruiformes	Rallidae	Pardirallus	Pardirallus maculatus	Large wading birds	Suspected Host
Gruiformes	Rallidae	Pardirallus	Pardirallus nigricans	Large wading birds	Suspected Host
Gruiformes	Rallidae	Pardirallus	Pardirallus sanguinolentus	Large wading birds	Suspected Host
Charadriiformes	Pedionomidae	Pedionomus	Pedionomus torquatus	shorebirds	Suspected Host
Procellariiformes	Hydrobatidae	Pelagodroma	Pelagodroma marina	seabirds	Suspected Host
Procellariiformes	Pelecanoididae	Pelecanoides	Pelecanoides urinatrix	seabirds	Suspected Host
Pelecaniformes	Pelecanidae	Pelecanus	Pelecanus conspicillatus	others	Suspected Host
Pelecaniformes	Pelecanidae	Pelecanus	Pelecanus crispus	others	Confirmed Host
Pelecaniformes	Pelecanidae	Pelecanus	Pelecanus erythrorhynchos	others	Confirmed Host
Pelecaniformes	Pelecanidae	Pelecanus	Pelecanus occidentalis	others	Confirmed Host
Pelecaniformes	Pelecanidae	Pelecanus	Pelecanus onocrotalus	others	Suspected Host
Pelecaniformes	Pelecanidae	Pelecanus	Pelecanus philippensis	others	Suspected Host
Pelecaniformes	Pelecanidae	Pelecanus	Pelecanus rufescens	others	Suspected Host
Pelecaniformes	Pelecanidae	Pelecanus	Pelecanus thagus	others	Suspected Host
Charadriiformes	Charadriidae	Peltohyas	Peltohyas australis	shorebirds	Suspected Host
Phaethontiformes	Phaethontidae	Phaethon	Phaethon aethereus	seabirds	Suspected Host
Phaethontiformes	Phaethontidae	Phaethon	Phaethon lepturus	seabirds	Suspected Host
Phaethontiformes	Phaethontidae	Phaethon	Phaethon rubricauda	seabirds	Suspected Host
Charadriiformes	Laridae	Phaetusa	Phaetusa simplex	seabirds	Suspected Host
Suliformes	Phalacrocoracidae	Phalacrocorax	Phalacrocorax aristotelis	seabirds	Suspected Host
Suliformes	Phalacrocoracidae	Phalacrocorax	Phalacrocorax auritus	seabirds	Confirmed Host
Suliformes	Phalacrocoracidae	Phalacrocorax	Phalacrocorax brasilianus	seabirds	Confirmed Host
Suliformes	Phalacrocoracidae	Phalacrocorax	Phalacrocorax capensis	seabirds	Suspected Host
Suliformes	Phalacrocoracidae	Phalacrocorax	Phalacrocorax capillatus	seabirds	Suspected Host
Suliformes	Phalacrocoracidae	Phalacrocorax	Phalacrocorax carbo	seabirds	Suspected Host
Suliformes	Phalacrocoracidae	Phalacrocorax	Phalacrocorax fuscescens	seabirds	Suspected Host
Suliformes	Phalacrocoracidae	Phalacrocorax	Phalacrocorax fuscicollis	seabirds	Suspected Host
Suliformes	Phalacrocoracidae	Phalacrocorax	Phalacrocorax lucidus	seabirds	Suspected Host
Suliformes	Phalacrocoracidae	Phalacrocorax	Phalacrocorax pelagicus	seabirds	Suspected Host
Suliformes	Phalacrocoracidae	Phalacrocorax	Phalacrocorax penicillatus	seabirds	Suspected Host
Suliformes	Phalacrocoracidae	Phalacrocorax	Phalacrocorax punctatus	seabirds	Suspected Host
Suliformes	Phalacrocoracidae	Phalacrocorax	Phalacrocorax sulcirostris	seabirds	Suspected Host
Suliformes	Phalacrocoracidae	Phalacrocorax	Phalacrocorax urile	seabirds	Suspected Host
Suliformes	Phalacrocoracidae	Phalacrocorax	Phalacrocorax varius	seabirds	Suspected Host
Charadriiformes	Scolopacidae	Phalaropus	Phalaropus fulicarius	shorebirds	Suspected Host
Charadriiformes	Scolopacidae	Phalaropus	Phalaropus lobatus	shorebirds	Confirmed Host
Charadriiformes	Charadriidae	Phegornis	Phegornis mitchellii	shorebirds	Suspected Host
Pelecaniformes	Threskiornithidae	Phimosus	Phimosus infuscatus	Large wading birds	Suspected Host
Procellariiformes	Diomedeidae	Phoebastria	Phoebastria albatrus	seabirds	Suspected Host
Procellariiformes	Diomedeidae	Phoebastria	Phoebastria immutabilis	seabirds	Suspected Host
Procellariiformes	Diomedeidae	Phoebastria	Phoebastria nigripes	seabirds	Suspected Host
Procellariiformes	Diomedeidae	Phoebetria	Phoebetria palpebrata	seabirds	Suspected Host
Phoenicopteriformes	Phoenicopteridae	Phoeniconaias	Phoeniconaias minor	others	Confirmed Host
Phoenicopteriformes	Phoenicopteridae	Phoenicoparrus	Phoenicoparrus andinus	others	Suspected Host
Phoenicopteriformes	Phoenicopteridae	Phoenicoparrus	Phoenicoparrus jamesi	others	Suspected Host
Phoenicopteriformes	Phoenicopteridae	Phoenicopterus	Phoenicopterus chilensis	others	Confirmed Host
Phoenicopteriformes	Phoenicopteridae	Phoenicopterus	Phoenicopterus roseus	others	Suspected Host
Phoenicopteriformes	Phoenicopteridae	Phoenicopterus	Phoenicopterus ruber	others	Suspected Host
Pelecaniformes	Ardeidae	Pilherodius	Pilherodius pileatus	Large wading birds	Suspected Host
Pelecaniformes	Threskiornithidae	Platalea	Platalea ajaja	shorebirds	Suspected Host
Pelecaniformes	Threskiornithidae	Platalea	Platalea alba	shorebirds	Suspected Host
Pelecaniformes	Threskiornithidae	Platalea	Platalea flavipes	shorebirds	Suspected Host
Pelecaniformes	Threskiornithidae	Platalea	Platalea leucorodia	shorebirds	Suspected Host
Pelecaniformes	Threskiornithidae	Platalea	Platalea minor	shorebirds	Suspected Host
Pelecaniformes	Threskiornithidae	Platalea	Platalea regia	shorebirds	Suspected Host
Anseriformes	Anatidae	Plectropterus	Plectropterus gambensis	waterfowl	Suspected Host
Pelecaniformes	Threskiornithidae	Plegadis	Plegadis chihi	Large wading birds	Confirmed Host
Pelecaniformes	Threskiornithidae	Plegadis	Plegadis falcinellus	Large wading birds	Confirmed Host
Pelecaniformes	Threskiornithidae	Plegadis	Plegadis ridgwayi	Large wading birds	Suspected Host
Charadriiformes	Charadriidae	Pluvialis	Pluvialis apricaria	shorebirds	Suspected Host
Charadriiformes	Charadriidae	Pluvialis	Pluvialis dominica	shorebirds	Suspected Host
Charadriiformes	Charadriidae	Pluvialis	Pluvialis fulva	shorebirds	Suspected Host
Charadriiformes	Charadriidae	Pluvialis	Pluvialis squatarola	shorebirds	Suspected Host
Charadriiformes	Pluvianidae	Pluvianus	Pluvianus aegyptius	shorebirds	Suspected Host
Gruiformes	Heliornithidae	Podica	Podica senegalensis	Large wading birds	Suspected Host
Podicipediformes	Podicipedidae	Podiceps	Podiceps auritus	others	Confirmed Host
Podicipediformes	Podicipedidae	Podiceps	Podiceps cristatus	others	Confirmed Host
Podicipediformes	Podicipedidae	Podiceps	Podiceps grisegena	others	Confirmed Host
Podicipediformes	Podicipedidae	Podiceps	Podiceps major	others	Suspected Host
Podicipediformes	Podicipedidae	Podiceps	Podiceps nigricollis	others	Confirmed Host
Podicipediformes	Podicipedidae	Podiceps	Podiceps occipitalis	others	Suspected Host
Podicipediformes	Podicipedidae	Podilymbus	Podilymbus podiceps	others	Confirmed Host
Podicipediformes	Podicipedidae	Poliocephalus	Poliocephalus poliocephalus	others	Suspected Host
Podicipediformes	Podicipedidae	Poliocephalus	Poliocephalus rufopectus	others	Suspected Host
Anseriformes	Anatidae	Polysticta	Polysticta stelleri	waterfowl	Suspected Host
Gruiformes	Rallidae	Porphyrio	Porphyrio alleni	Large wading birds	Suspected Host
Gruiformes	Rallidae	Porphyrio	Porphyrio melanotus	Large wading birds	Suspected Host
Gruiformes	Rallidae	Porphyrio	Porphyrio porphyrio	Large wading birds	Suspected Host
Gruiformes	Rallidae	Porzana	Porzana carolina	Large wading birds	Suspected Host
Gruiformes	Rallidae	Porzana	Porzana fluminea	Large wading birds	Suspected Host
Gruiformes	Rallidae	Porzana	Porzana porzana	Large wading birds	Suspected Host
Procellariiformes	Procellariidae	Procellaria	Procellaria aequinoctialis	seabirds	Suspected Host
Procellariiformes	Procellariidae	Procellaria	Procellaria cinerea	seabirds	Suspected Host
Procellariiformes	Procellariidae	Procellaria	Procellaria parkinsoni	seabirds	Suspected Host
Procellariiformes	Procellariidae	Procellaria	Procellaria westlandica	seabirds	Suspected Host
Pelecaniformes	Threskiornithidae	Pseudibis	Pseudibis papillosa	Large wading birds	Suspected Host
Procellariiformes	Procellariidae	Pseudobulweria	Pseudobulweria rostrata	seabirds	Suspected Host
Gruiformes	Psophiidae	Psophia	Psophia crepitans	Large wading birds	Suspected Host
Procellariiformes	Procellariidae	Pterodroma	Pterodroma cookii	seabirds	Suspected Host
Procellariiformes	Procellariidae	Pterodroma	Pterodroma inexpectata	seabirds	Suspected Host
Procellariiformes	Procellariidae	Pterodroma	Pterodroma lessonii	seabirds	Suspected Host
Procellariiformes	Procellariidae	Pterodroma	Pterodroma leucoptera	seabirds	Suspected Host
Procellariiformes	Procellariidae	Pterodroma	Pterodroma macroptera	seabirds	Suspected Host
Procellariiformes	Procellariidae	Pterodroma	Pterodroma nigripennis	seabirds	Suspected Host
Procellariiformes	Procellariidae	Pterodroma	Pterodroma solandri	seabirds	Suspected Host
Anseriformes	Anatidae	Pteronetta	Pteronetta hartlaubii	waterfowl	Suspected Host
Charadriiformes	Alcidae	Ptychoramphus	Ptychoramphus aleuticus	seabirds	Suspected Host
Procellariiformes	Procellariidae	Puffinus	Puffinus assimilis	seabirds	Suspected Host
Procellariiformes	Procellariidae	Puffinus	Puffinus gavia	seabirds	Suspected Host
Procellariiformes	Procellariidae	Puffinus	Puffinus huttoni	seabirds	Suspected Host
Procellariiformes	Procellariidae	Puffinus	Puffinus lherminieri	seabirds	Suspected Host
Procellariiformes	Procellariidae	Puffinus	Puffinus mauretanicus	seabirds	Suspected Host
Procellariiformes	Procellariidae	Puffinus	Puffinus opisthomelas	seabirds	Suspected Host
Procellariiformes	Procellariidae	Puffinus	Puffinus persicus	seabirds	Suspected Host
Procellariiformes	Procellariidae	Puffinus	Puffinus puffinus	seabirds	Suspected Host
Procellariiformes	Procellariidae	Puffinus	Puffinus yelkouan	seabirds	Suspected Host
Sphenisciformes	Spheniscidae	Pygoscelis	Pygoscelis adeliae	seabirds	Confirmed Host
Sphenisciformes	Spheniscidae	Pygoscelis	Pygoscelis antarcticus	seabirds	Confirmed Host
Sphenisciformes	Spheniscidae	Pygoscelis	Pygoscelis papua	seabirds	Suspected Host
Anseriformes	Anatidae	Radjah	Radjah radjah	waterfowl	Suspected Host
Gruiformes	Rallidae	Rallina	Rallina eurizonoides	Large wading birds	Suspected Host
Gruiformes	Rallidae	Rallus	Rallus aquaticus	Large wading birds	Suspected Host
Gruiformes	Rallidae	Rallus	Rallus caerulescens	Large wading birds	Suspected Host
Gruiformes	Rallidae	Rallus	Rallus crepitans	Large wading birds	Suspected Host
Gruiformes	Rallidae	Rallus	Rallus elegans	Large wading birds	Suspected Host
Gruiformes	Rallidae	Rallus	Rallus indicus	Large wading birds	Suspected Host
Gruiformes	Rallidae	Rallus	Rallus limicola	Large wading birds	Suspected Host
Gruiformes	Rallidae	Rallus	Rallus madagascariensis	others	Suspected Host
Gruiformes	Rallidae	Rallus	Rallus obsoletus	Large wading birds	Suspected Host
Charadriiformes	Recurvirostridae	Recurvirostra	Recurvirostra americana	shorebirds	Suspected Host
Charadriiformes	Recurvirostridae	Recurvirostra	Recurvirostra andina	shorebirds	Suspected Host
Charadriiformes	Recurvirostridae	Recurvirostra	Recurvirostra avosetta	shorebirds	Suspected Host
Charadriiformes	Recurvirostridae	Recurvirostra	Recurvirostra novaehollandiae	shorebirds	Suspected Host
Charadriiformes	Glareolidae	Rhinoptilus	Rhinoptilus africanus	shorebirds	Suspected Host
Charadriiformes	Glareolidae	Rhinoptilus	Rhinoptilus chalcopterus	shorebirds	Suspected Host
Charadriiformes	Glareolidae	Rhinoptilus	Rhinoptilus cinctus	shorebirds	Suspected Host
Charadriiformes	Laridae	Rissa	Rissa tridactyla	seabirds	Confirmed Host
Podicipediformes	Podicipedidae	Rollandia	Rollandia rolland	others	Suspected Host
Charadriiformes	Rostratulidae	Rostratula	Rostratula australis	shorebirds	Suspected Host
Charadriiformes	Rostratulidae	Rostratula	Rostratula benghalensis	shorebirds	Suspected Host
Charadriiformes	Laridae	Rynchops	Rynchops albicollis	shorebirds	Suspected Host
Charadriiformes	Laridae	Rynchops	Rynchops flavirostris	shorebirds	Suspected Host
Charadriiformes	Laridae	Rynchops	Rynchops niger	shorebirds	Confirmed Host
Anseriformes	Anatidae	Sarkidiornis	Sarkidiornis melanotos	waterfowl	Suspected Host
Anseriformes	Anatidae	Sarkidiornis	Sarkidiornis sylvicola	waterfowl	Confirmed Host
Gruiformes	Rallidae	Sarothrura	Sarothrura affinis	others	Suspected Host
Gruiformes	Rallidae	Sarothrura	Sarothrura boehmi	others	Suspected Host
Gruiformes	Rallidae	Sarothrura	Sarothrura elegans	others	Suspected Host
Gruiformes	Rallidae	Sarothrura	Sarothrura insularis	others	Suspected Host
Gruiformes	Rallidae	Sarothrura	Sarothrura pulchra	Large wading birds	Suspected Host
Gruiformes	Rallidae	Sarothrura	Sarothrura rufa	others	Suspected Host
Charadriiformes	Scolopacidae	Scolopax	Scolopax minor	shorebirds	Suspected Host
Charadriiformes	Scolopacidae	Scolopax	Scolopax rusticola	shorebirds	Confirmed Host
Pelecaniformes	Scopidae	Scopus	Scopus umbretta	Large wading birds	Suspected Host
Strigiformes	Strigidae	Scotopelia	Scotopelia bouvieri	others	Suspected Host
Strigiformes	Strigidae	Scotopelia	Scotopelia peli	others	Suspected Host
Anseriformes	Anatidae	Sibirionetta	Sibirionetta formosa	waterfowl	Confirmed Host
Anseriformes	Anatidae	Somateria	Somateria fischeri	waterfowl	Confirmed Host
Anseriformes	Anatidae	Somateria	Somateria mollissima	waterfowl	Confirmed Host
Anseriformes	Anatidae	Somateria	Somateria spectabilis	waterfowl	Confirmed Host
Anseriformes	Anatidae	Spatula	Spatula clypeata	waterfowl	Confirmed Host
Anseriformes	Anatidae	Spatula	Spatula cyanoptera	waterfowl	Confirmed Host
Anseriformes	Anatidae	Spatula	Spatula discors	waterfowl	Confirmed Host
Anseriformes	Anatidae	Spatula	Spatula hottentota	waterfowl	Suspected Host
Anseriformes	Anatidae	Spatula	Spatula platalea	waterfowl	Confirmed Host
Anseriformes	Anatidae	Spatula	Spatula puna	waterfowl	Confirmed Host
Anseriformes	Anatidae	Spatula	Spatula querquedula	waterfowl	Confirmed Host
Anseriformes	Anatidae	Spatula	Spatula rhynchotis	waterfowl	Suspected Host
Anseriformes	Anatidae	Spatula	Spatula smithii	waterfowl	Confirmed Host
Anseriformes	Anatidae	Spatula	Spatula versicolor	waterfowl	Confirmed Host
Anseriformes	Anatidae	Speculanas	Speculanas specularis	waterfowl	Suspected Host
Sphenisciformes	Spheniscidae	Spheniscus	Spheniscus demersus	seabirds	Suspected Host
Sphenisciformes	Spheniscidae	Spheniscus	Spheniscus humboldti	seabirds	Suspected Host
Sphenisciformes	Spheniscidae	Spheniscus	Spheniscus magellanicus	seabirds	Suspected Host
Charadriiformes	Stercorariidae	Stercorarius	Stercorarius antarcticus	seabirds	Confirmed Host
Charadriiformes	Stercorariidae	Stercorarius	Stercorarius longicaudus	seabirds	Suspected Host
Charadriiformes	Stercorariidae	Stercorarius	Stercorarius maccormicki	seabirds	Suspected Host
Charadriiformes	Stercorariidae	Stercorarius	Stercorarius parasiticus	seabirds	Confirmed Host
Charadriiformes	Stercorariidae	Stercorarius	Stercorarius pomarinus	seabirds	Suspected Host
Charadriiformes	Stercorariidae	Stercorarius	Stercorarius skua	seabirds	Suspected Host
Charadriiformes	Laridae	Sterna	Sterna aurantia	shorebirds	Suspected Host
Charadriiformes	Laridae	Sterna	Sterna dougallii	seabirds	Suspected Host
Charadriiformes	Laridae	Sterna	Sterna forsteri	seabirds	Confirmed Host
Charadriiformes	Laridae	Sterna	Sterna hirundinacea	seabirds	Suspected Host
Charadriiformes	Laridae	Sterna	Sterna hirundo	seabirds	Confirmed Host
Charadriiformes	Laridae	Sterna	Sterna paradisaea	seabirds	Confirmed Host
Charadriiformes	Laridae	Sterna	Sterna repressa	seabirds	Suspected Host
Charadriiformes	Laridae	Sterna	Sterna striata	seabirds	Suspected Host
Charadriiformes	Laridae	Sterna	Sterna sumatrana	seabirds	Suspected Host
Charadriiformes	Laridae	Sterna	Sterna trudeaui	seabirds	Suspected Host
Charadriiformes	Laridae	Sterna	Sterna vittata	seabirds	Suspected Host
Charadriiformes	Laridae	Sternula	Sternula albifrons	seabirds	Confirmed Host
Charadriiformes	Laridae	Sternula	Sternula antillarum	seabirds	Suspected Host
Charadriiformes	Laridae	Sternula	Sternula balaenarum	seabirds	Suspected Host
Charadriiformes	Laridae	Sternula	Sternula nereis	seabirds	Suspected Host
Charadriiformes	Laridae	Sternula	Sternula superciliaris	seabirds	Suspected Host
Anseriformes	Anatidae	Stictonetta	Stictonetta naevosa	waterfowl	Suspected Host
Charadriiformes	Glareolidae	Stiltia	Stiltia isabella	shorebirds	Suspected Host
Suliformes	Sulidae	Sula	Sula dactylatra	seabirds	Suspected Host
Suliformes	Sulidae	Sula	Sula granti	seabirds	Suspected Host
Suliformes	Sulidae	Sula	Sula leucogaster	seabirds	Suspected Host
Suliformes	Sulidae	Sula	Sula nebouxii	seabirds	Suspected Host
Suliformes	Sulidae	Sula	Sula sula	seabirds	Suspected Host
Suliformes	Sulidae	Sula	Sula variegata	seabirds	Suspected Host
Charadriiformes	Alcidae	Synthliboramphus	Synthliboramphus antiquus	seabirds	Suspected Host
Charadriiformes	Alcidae	Synthliboramphus	Synthliboramphus craveri	seabirds	Suspected Host
Charadriiformes	Alcidae	Synthliboramphus	Synthliboramphus scrippsi	seabirds	Suspected Host
Pelecaniformes	Ardeidae	Syrigma	Syrigma sibilatrix	Large wading birds	Suspected Host
Podicipediformes	Podicipedidae	Tachybaptus	Tachybaptus dominicus	others	Suspected Host
Podicipediformes	Podicipedidae	Tachybaptus	Tachybaptus novaehollandiae	others	Suspected Host
Podicipediformes	Podicipedidae	Tachybaptus	Tachybaptus pelzelnii	seabirds	Suspected Host
Podicipediformes	Podicipedidae	Tachybaptus	Tachybaptus ruficollis	others	Confirmed Host
Anseriformes	Anatidae	Tachyeres	Tachyeres patachonicus	waterfowl	Suspected Host
Anseriformes	Anatidae	Tachyeres	Tachyeres pteneres	waterfowl	Suspected Host
Anseriformes	Anatidae	Tadorna	Tadorna cana	waterfowl	Suspected Host
Anseriformes	Anatidae	Tadorna	Tadorna ferruginea	waterfowl	Confirmed Host
Anseriformes	Anatidae	Tadorna	Tadorna tadorna	waterfowl	Confirmed Host
Anseriformes	Anatidae	Tadorna	Tadorna tadornoides	waterfowl	Suspected Host
Anseriformes	Anatidae	Tadorna	Tadorna variegata	waterfowl	Suspected Host
Procellariiformes	Diomedeidae	Thalassarche	Thalassarche bulleri	seabirds	Suspected Host
Procellariiformes	Diomedeidae	Thalassarche	Thalassarche carteri	seabirds	Suspected Host
Procellariiformes	Diomedeidae	Thalassarche	Thalassarche cauta	seabirds	Suspected Host
Procellariiformes	Diomedeidae	Thalassarche	Thalassarche chlororhynchos	seabirds	Suspected Host
Procellariiformes	Diomedeidae	Thalassarche	Thalassarche chrysostoma	seabirds	Suspected Host
Procellariiformes	Diomedeidae	Thalassarche	Thalassarche impavida	seabirds	Suspected Host
Procellariiformes	Diomedeidae	Thalassarche	Thalassarche melanophris	seabirds	Suspected Host
Procellariiformes	Diomedeidae	Thalassarche	Thalassarche salvini	seabirds	Suspected Host
Charadriiformes	Laridae	Thalasseus	Thalasseus acuflavidus	seabirds	Suspected Host
Charadriiformes	Laridae	Thalasseus	Thalasseus bengalensis	seabirds	Suspected Host
Charadriiformes	Laridae	Thalasseus	Thalasseus bergii	seabirds	Suspected Host
Charadriiformes	Laridae	Thalasseus	Thalasseus elegans	seabirds	Confirmed Host
Charadriiformes	Laridae	Thalasseus	Thalasseus maximus	seabirds	Confirmed Host
Charadriiformes	Laridae	Thalasseus	Thalasseus sandvicensis	seabirds	Confirmed Host
Procellariiformes	Procellariidae	Thalassoica	Thalassoica antarctica	seabirds	Suspected Host
Anseriformes	Anatidae	Thalassornis	Thalassornis leuconotus	waterfowl	Suspected Host
Pelecaniformes	Threskiornithidae	Theristicus	Theristicus caerulescens	Large wading birds	Suspected Host
Pelecaniformes	Threskiornithidae	Theristicus	Theristicus caudatus	Large wading birds	Suspected Host
Pelecaniformes	Threskiornithidae	Theristicus	Theristicus melanopis	Large wading birds	Suspected Host
Charadriiformes	Thinocoridae	Thinocorus	Thinocorus orbignyianus	shorebirds	Suspected Host
Charadriiformes	Thinocoridae	Thinocorus	Thinocorus rumicivorus	shorebirds	Suspected Host
Charadriiformes	Charadriidae	Thinornis	Thinornis cucullatus	shorebirds	Suspected Host
Pelecaniformes	Threskiornithidae	Threskiornis	Threskiornis aethiopicus	others	Suspected Host
Pelecaniformes	Threskiornithidae	Threskiornis	Threskiornis bernieri	Large wading birds	Suspected Host
Pelecaniformes	Threskiornithidae	Threskiornis	Threskiornis melanocephalus	others	Suspected Host
Pelecaniformes	Threskiornithidae	Threskiornis	Threskiornis spinicollis	others	Suspected Host
Pelecaniformes	Ardeidae	Tigriornis	Tigriornis leucolopha	Large wading birds	Suspected Host
Pelecaniformes	Ardeidae	Tigrisoma	Tigrisoma fasciatum	Large wading birds	Suspected Host
Pelecaniformes	Ardeidae	Tigrisoma	Tigrisoma lineatum	Large wading birds	Suspected Host
Pelecaniformes	Ardeidae	Tigrisoma	Tigrisoma mexicanum	Large wading birds	Suspected Host
Charadriiformes	Scolopacidae	Tringa	Tringa brevipes	shorebirds	Suspected Host
Charadriiformes	Scolopacidae	Tringa	Tringa erythropus	shorebirds	Suspected Host
Charadriiformes	Scolopacidae	Tringa	Tringa flavipes	shorebirds	Suspected Host
Charadriiformes	Scolopacidae	Tringa	Tringa glareola	shorebirds	Suspected Host
Charadriiformes	Scolopacidae	Tringa	Tringa incana	shorebirds	Suspected Host
Charadriiformes	Scolopacidae	Tringa	Tringa melanoleuca	shorebirds	Suspected Host
Charadriiformes	Scolopacidae	Tringa	Tringa nebularia	shorebirds	Suspected Host
Charadriiformes	Scolopacidae	Tringa	Tringa ochropus	shorebirds	Suspected Host
Charadriiformes	Scolopacidae	Tringa	Tringa semipalmata	shorebirds	Confirmed Host
Charadriiformes	Scolopacidae	Tringa	Tringa solitaria	shorebirds	Suspected Host
Charadriiformes	Scolopacidae	Tringa	Tringa stagnatilis	shorebirds	Suspected Host
Charadriiformes	Scolopacidae	Tringa	Tringa totanus	shorebirds	Confirmed Host
Charadriiformes	Turnicidae	Turnix	Turnix castanotus	shorebirds	Suspected Host
Gruiformes	Turnicidae	Turnix	Turnix hottentottus	shorebirds	Suspected Host
Charadriiformes	Turnicidae	Turnix	Turnix maculosus	shorebirds	Suspected Host
Charadriiformes	Turnicidae	Turnix	Turnix melanogaster	shorebirds	Suspected Host
Gruiformes	Turnicidae	Turnix	Turnix nanus	shorebirds	Suspected Host
Charadriiformes	Turnicidae	Turnix	Turnix nigricollis	shorebirds	Suspected Host
Charadriiformes	Turnicidae	Turnix	Turnix pyrrhothorax	shorebirds	Suspected Host
Charadriiformes	Turnicidae	Turnix	Turnix suscitator	shorebirds	Suspected Host
Charadriiformes	Turnicidae	Turnix	Turnix sylvaticus	shorebirds	Suspected Host
Charadriiformes	Turnicidae	Turnix	Turnix varius	shorebirds	Suspected Host
Charadriiformes	Turnicidae	Turnix	Turnix velox	shorebirds	Suspected Host
Charadriiformes	Alcidae	Uria	Uria aalge	seabirds	Suspected Host
Charadriiformes	Alcidae	Uria	Uria lomvia	seabirds	Suspected Host
Charadriiformes	Charadriidae	Vanellus	Vanellus albiceps	shorebirds	Suspected Host
Charadriiformes	Charadriidae	Vanellus	Vanellus armatus	shorebirds	Suspected Host
Charadriiformes	Charadriidae	Vanellus	Vanellus chilensis	shorebirds	Suspected Host
Charadriiformes	Charadriidae	Vanellus	Vanellus cinereus	shorebirds	Suspected Host
Charadriiformes	Charadriidae	Vanellus	Vanellus coronatus	shorebirds	Suspected Host
Charadriiformes	Charadriidae	Vanellus	Vanellus crassirostris	shorebirds	Suspected Host
Charadriiformes	Charadriidae	Vanellus	Vanellus duvaucelii	shorebirds	Suspected Host
Charadriiformes	Charadriidae	Vanellus	Vanellus gregarius	shorebirds	Suspected Host
Charadriiformes	Charadriidae	Vanellus	Vanellus indicus	shorebirds	Suspected Host
Charadriiformes	Charadriidae	Vanellus	Vanellus leucurus	shorebirds	Suspected Host
Charadriiformes	Charadriidae	Vanellus	Vanellus lugubris	shorebirds	Suspected Host
Charadriiformes	Charadriidae	Vanellus	Vanellus malabaricus	shorebirds	Suspected Host
Charadriiformes	Charadriidae	Vanellus	Vanellus melanopterus	shorebirds	Suspected Host
Charadriiformes	Charadriidae	Vanellus	Vanellus miles	shorebirds	Suspected Host
Charadriiformes	Charadriidae	Vanellus	Vanellus resplendens	shorebirds	Suspected Host
Charadriiformes	Charadriidae	Vanellus	Vanellus senegallus	shorebirds	Suspected Host
Charadriiformes	Charadriidae	Vanellus	Vanellus spinosus	shorebirds	Suspected Host
Charadriiformes	Charadriidae	Vanellus	Vanellus superciliosus	shorebirds	Suspected Host
Charadriiformes	Charadriidae	Vanellus	Vanellus tectus	shorebirds	Suspected Host
Charadriiformes	Charadriidae	Vanellus	Vanellus tricolor	shorebirds	Suspected Host
Charadriiformes	Charadriidae	Vanellus	Vanellus vanellus	shorebirds	Suspected Host
Charadriiformes	Scolopacidae	Xenus	Xenus cinereus	shorebirds	Suspected Host
Pelecaniformes	Ardeidae	Zebrilus	Zebrilus undulatus	Large wading birds	Suspected Host
