# Supplementary material for: Global Avian Flu Risk: Waterbird Entropy for Targeted Surveillance
Source: Research Square preprint supplement (doi:10.21203/rs.3.rs-6120298/v1), 2025-03-17
Supplement: Supplementary file 2 [file bc35cbf373c4ca088b8adeb6.docx]

Supplementary Information for:

**Incorporating** **Waterbird Species Richness Distribution and Residency Time to Improve Avian Influenza Virus Exposure Risk Assessment Framework**

**1. Supplementary Text - Data sources and processing of socio-environmental and climatic covariates**

**Population density:**

The population density data was download from Center for International Earth Science Information Network (Gridded Population of the World, Version 4, GPWv4) for the year 2015 at ~1 km spatial resolution 113. The population data was collected census observations in 2015 and then distributed to cells using proportional allocation of population from census and administrative units. The population density at each grid was calculated as the number of persons per square kilometer, consistent with national censuses and population registers.

**Cattle and Poultry density:**

We download cattle and poultry density data from Gridded Livestock of the World, Version 4 (GLW 4), which collected detailed livestock census statistics from agricultural yearbooks or through direct contacts with ministries or statistical bureau at ~10 km spatial resolution 114. The data predicted spatial pattern of cattle, buffaloes, horses, sheep, goats, pigs, chickens and ducks in 2015 based on the random forest models. In this study, we only focus the spillover of avian influenza to chicken, duck and cattle. The duck and chicken density gridded maps were summed as poultry density.

**Gross primary productivity and net primary productivity:**

The gross primary productivity (GPP) was obtained from Zhang (2017) 115, which provided 8-days temporal resolution and ~500 m spatial resolution from 2000 to 2016. The data is based on an improved light use efficiency theory and is driven by satellite data from MODIS and climate data from NCEP Reanalysis II. It has shown satisfactory performance when validated against in situ GPP estimates. We averaged the annual monthly GPP from the 8-day grids and calculated the GPP coefficient of variation. The Net Primary Productivity (NPP) data is derived annually from the MODIS Net Primary Production product (MOD17A3) at a 1-kilometer pixel resolution. This product aims to provide an accurate and regular measure of terrestrial vegetation growth.

**Uncertainty analyses of this study**

The dataset used to simulate the monthly abundance of waterbirds is sourced from citizen science data (GBIF data), and the use and limitations of this data have been discussed in relevant literature 116. Despite our efforts in data cleaning to improve the quality of the data, factors such as the expertise level of the observers and the geographic distribution bias of the observation points still lead to incompleteness and systematic bias in the observation data 117.

**Remote sensing index:**

We used Normalized Difference Vegetation Index (NDVI), Normalized Difference Water Index (NDWI) and Leaf Area Index (LAI) to reflect the impact of vegetation and habitat preference on waterbirds. The NDVI was used from MOD13A2 V6.1, derived from National Oceanic and Atmospheric Administration-Advanced Very High-Resolution Radiometer (NOAA-AVHRR). This dataset features cloud-free, low view angle, and noise reduction. The formula for NDVI is as follows:

Where and represent bands of MODIS 1 (620-670 nm, Nadir_Reflectance_Band1) and MODIS 2 (841–876 nm, Nadir_Reflectance_Band2), respectively.

The NDWI was calculated by MOD09A1 V6.1, which provided 8-day estimates of the surface spectral reflectance of Terra MODIS bands 1-7 at 500m resolution. The formula for NDWI is as follows:

Where and represent bands of MODIS 5 (1230-1250 nm, Nadir_Reflectance_Band5) and MODIS 2 (841–876 nm, Nadir_Reflectance_Band2), respectively.

The LAI was downloaded from National Oceanic and Atmospheric Administration Climate Data Record (NOAA-CDR). This dataset is derived from the NOAA-AVHRR Surface Reflectance product and has a spatial resolution of 0.05° daily. All remote sensing data were averaged to an annual scale and filtered for the year 2010.

The nighttime lights density data was downloaded from Earth Observation Group, which detects visible and near-infrared (VNIR) emission sources at night with a spatial resolution of approximately 1 km and a temporal resolution of one month 118. The spatial resolution of the remote sensing data was resampled at 0.5° to be consistent with Species Distribution Models (SDMs).

**Road density:**

The road density data was downloaded from the Food and Agriculture Organization of the United Nations (FAO). This data is provided by the Global Roads Inventory Project (GRIP) dataset 119, which offers global raster datasets of road density at ~8 km resolution. The nightlight density data, which measures the intensity of artificial light in an area, was sourced from the Earth Observation Group. This dataset provides valuable insights into human activity patterns and urbanization levels.

**Improvement of the SDMs by considering more environmental factors**

In this study, we also introduced water proportion as an input variable to improve the SDMs (SDM-w, see Methods). Since water bodies are important habitats for waterbirds, which are natural hosts of avian influenza, surface water proportion can be a critical predictor for predicting waterbird distribution 120-122. Comparing the two SDM construction methods among 753 species (with and without water proportion data inputs), we found a significantly improved model performance (Extended Data Fig. 11). Incorporating water information into the SDMs outperformed the original method, which typically uses simple and rough filters to determine host presence, subsequently influencing the AIV exposure risk assessment.

**2. Supplementary Text - Statistical analysis**

**Peak month definition:**

Based on the results of SDMs for each 753 waterbirds, we firstly calculated spatial pattern of species richness per pixels (Fig. 1). Furthermore, monthly temporal variation also been calculated using monthly SDMs (Fig. 2). To figure out the seasonal variation of waterbirds, we used Augmented Dickey-Fuller Test (ADF-test) to test the stationary of monthly species richness per pixels. The ADF-test incorporates three types of trend models. Considering the birds migration and random observation error, we used ‘type2’ which included drift but no linear trend. For non-stationary pixels, we determined the most significant turning point of month to classify the pixels into ‘peak’ or ‘pit’. We utilize urban boundary data to extract the fluctuations in monthly species richness across Calgary, Moscow, Houston, Guangzhou, Kampala, Adelaide, Paris, and Makassar. These cities serve as typical urban representatives, each illustrating the classification of monthly changes in species richness.

**Driver analysis:**

To explore the potential driving factors of waterbird activity entropy (WAE), we classified the factors into three groups: geographic and climate factors, vegetation factors, and human activity factors. The geographic and climate factors included longitude (°), latitude (°), precipitation (mm), temperature (oC), and the number of days below 0 oC (frost days). The vegetation factors included gross primary productivity (GPP, g C m−2 day−1), gross primary productivity coefficient of variation (GPP CV), net primary productivity (NPP, g C m−2 day−1), normalized difference vegetation index (NDVI), normalized difference water index (NDWI) and leaf area index (LAI). The human activity factors included nighttime lights (light density), road density (m per km2), human density (log-transformed, number per km2), and poultry density (log-transformed, number per km2). All waterbirds were classified into five functional groups based on their habitat and life cycle: seabirds, shorebirds, waterfowl, large wading birds, and others. For each group of drive factors, we performed a Mantel test to examine the correlation between driving factors and the composition of different functional groups using the vegan R package 123. We further analyzed the correlations between three types of driving factors and WAE across different regions using Pearson correlation in key exposure countries/regions.

**3. Supplementary Text -Drivers of WAE in High Exposure Risk Regions**

In the key exposure countries/regions—USA, EU, China, and India , which have the largest hotspot areas—we analyzed the correlations between WAE and various biotic and abiotic environmental factors (Extended Data Fig. 12a). Within the geographic and climate factors group, precipitation exhibit a robust positive correlation with WAE, whereas frost days demonstrates a strong negative correlation. In the vegetation indicator group, productivity-related factors such as GPP, NPP, and NDVI show potent positive correlation with WAE, suggesting a likely impact on waterbird distribution and migration patterns. Human activity factors revealed a significant positive correlation between WAE and human, cattle and poultry density. These relationships are more influential. By strategically arranging the distribution of human populations and cattle and poultry farming away from the waterbird habitats, there is an opportunity to better manage and mitigate the avian influenza spillover risk from waterbirds.

Subsequently, we applied linear regression models to WAE against human, cattle, and poultry density (Extended Data Fig. 12b). The results indicate a significant positive correlation between human density and WAE, particularly in the USA, China, and India, where the explanatory power (*R*²) exceed 0.4 (*P* < 0.001). Cattle density is significantly correlated to WAE in the USA, India (*P* < 0.001), with *R*² exceeding 0.3. For poultry density, China exhibits the steepest linear trend (k = 1.97), with an *R*² surpassing reaching 0.56. This may imply a greater urgency and difficulty in managing the high exposure risk in China.

Based on these findings, we further categorized waterbirds into five functional group types: seabirds, shorebirds, waterfowl, large wading birds, and others. The Mantel test results for USA (Extended Data Fig. 12c), reveals a strong correlation (Mantel’s r > 0.4) between geographic and climate factors and the WAE of seabirds. The same is for vegetation indicators group. Specially, only seabirds show strong correlation with human density. The functional groups in the other three regions exhibit diverse characteristics (Extended Data Fig. 12d). In the EU, only waterfowl are strongly correlated with both human and cattle density (Mantel’s r > 0.5). In China, poultry density is more strongly correlated with waterfowl. Our findings highlight the variability in exposure levels of human, cattle, and poultry to the dominant waterbird functional groups across different key exposure countries/regions.

Supplementary References

113 Warszawski, L. *et al.* Center for international earth science information network—ciesin—columbia university.(2016). gridded population of the world, version 4 (gpwv4): Population density. palisades. ny: Nasa socioeconomic data and applications center (sedac). doi: 10. 7927/h4np22dq. *Atlas of Environmental Risks Facing China Under Climate Change*, 228 (2017).

114 Gilbert, M. *et al.* Global distribution data for cattle, buffaloes, horses, sheep, goats, pigs, chickens and ducks in 2010. *Scientific data* **5**, 1-11 (2018).

115 Zhang, Y. *et al.* A global moderate resolution dataset of gross primary production of vegetation for 2000–2016. *Scientific data* **4**, 1-13 (2017).

116 Chandler, M. *et al.* Contribution of citizen science towards international biodiversity monitoring. *Biological Conservation* **213**, 280-294, doi:10.1016/j.biocon.2016.09.004 (2017).

117 Beck, J., Böller, M., Erhardt, A. & Schwanghart, W. Spatial bias in the GBIF database and its effect on modeling species' geographic distributions. *Ecological Informatics* **19**, 10-15, doi:10.1016/j.ecoinf.2013.11.002 (2014).

118 Hsu, F.-C., Baugh, K. E., Ghosh, T., Zhizhin, M. & Elvidge, C. D. DMSP-OLS radiance calibrated nighttime lights time series with intercalibration. *Remote Sensing* **7**, 1855-1876 (2015).

119 Meijer, J. R., Huijbregts, M. A., Schotten, K. C. & Schipper, A. M. Global patterns of current and future road infrastructure. *Environmental Research Letters* **13**, 064006 (2018).

120 Gibb, R. *et al.* Interactions between climate change, urban infrastructure and mobility are driving dengue emergence in Vietnam. *Nature Communications* **14**, 8179, doi:10.1038/s41467-023-43954-0 (2023).

121 Amano, T. *et al.* Successful conservation of global waterbird populations depends on effective governance. *Nature* **553**, 199-202, doi:10.1038/nature25139 (2018).

122 Xi, Y., Peng, S., Ciais, P. & Chen, Y. Future impacts of climate change on inland Ramsar wetlands. *Nature Climate Change* **11**, 45-51, doi:10.1038/s41558-020-00942-2 (2021).

123 Oksanen, J. Constrained ordination: tutorial with R and vegan. *R-packace Vegan* **1**, 1-9 (2012).
